# Supplementary material for: Developing a Se Quantum Dots@ CoFeOx Composite Nanomaterial as a Highly Active and Stable Cathode Material for Rechargeable Zinc–Air Batteries
Source: MDPI journal article supplement (doi:10.3390/batteries9110561), 2023-11-17
Supplement: s1 [file s1]

## Supporting Information

### Developing a Se Quantum Dots@ CoFeO<sub>x</sub> Composite Nanomaterial as a Highly Active and Stable Cathode Material for Rechargeable Zinc–Air Batteries

Donghao Zhang <sup>1</sup>, Yang Wang <sup>1,2</sup>, Xiaopeng Han <sup>1</sup> and Wenbin Hu <sup>1,3,\*</sup>

<sup>1</sup> Tianjin Key Laboratory of Composite and Functional Materials, Key Laboratory of Advanced Ceramics and Machining Technology (Ministry of Education), School of Materials Science and Engineering, Tianjin University, Tianjin 300350, China; xphan@tju.edu.cn (X.H.)

<sup>2</sup> State Key Laboratory of Marine Resource Utilization in South China Sea, School of Materials Science and Engineering, Hainan University, Haikou 570228, China

<sup>3</sup> Joint School of National University of Singapore and Tianjin University, International Campus of Tianjin University, Binhai New City, Fuzhou 350207, China

\* Correspondence: wbhu@tju.edu.cn

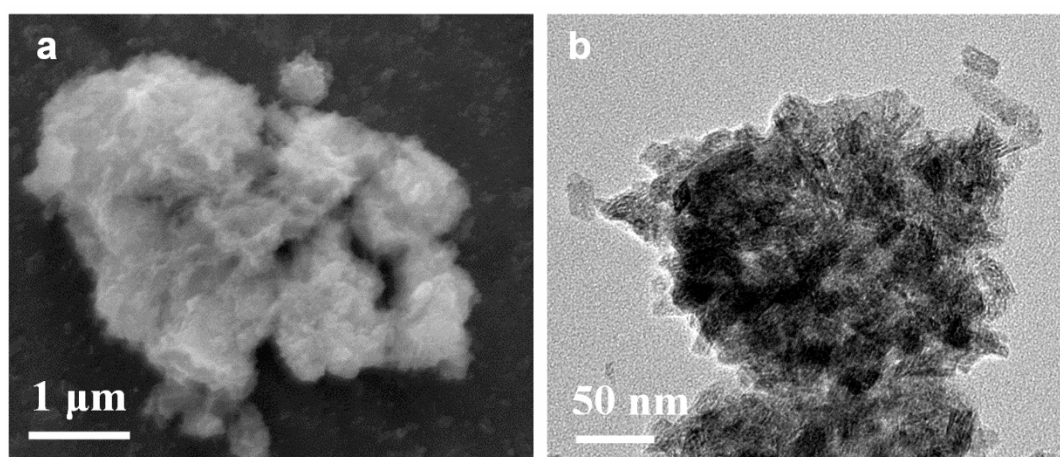

**Figure S1.** SEM and TEM images of Se-FeO<sub>x</sub> material.

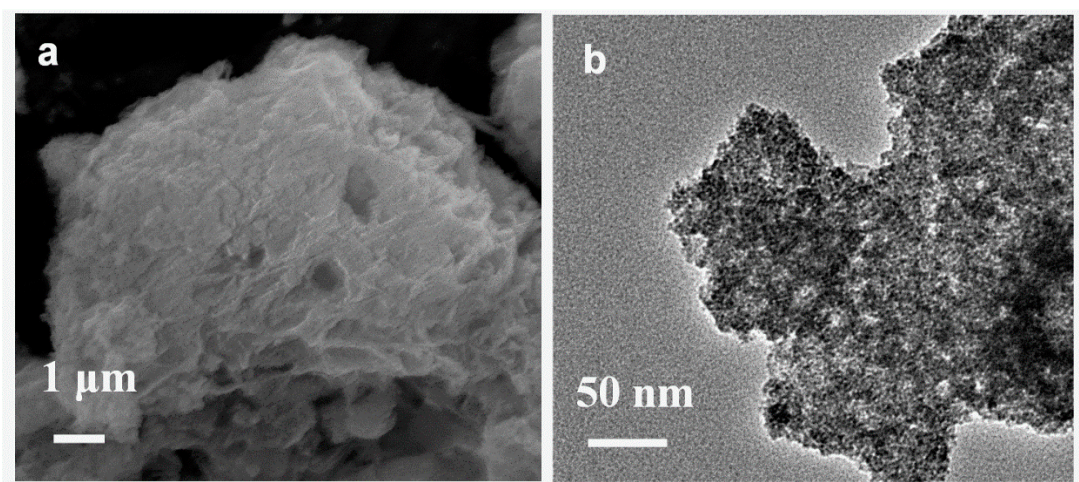

**Figure S2.** SEM and TEM images of Se-FeO<sub>x</sub>-Co-1 material.

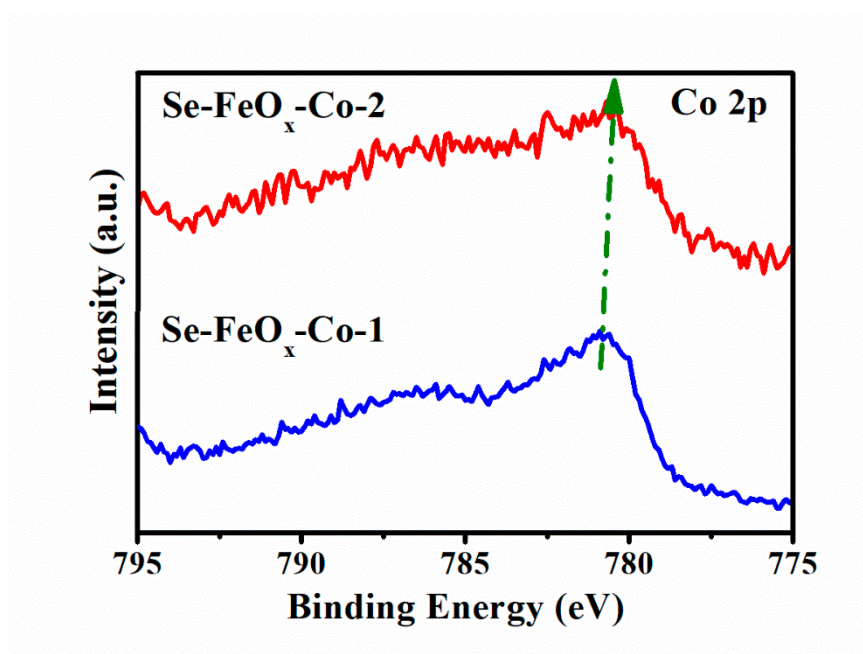

**Figure S3.** The Co 2p spectra of Se-FeO<sub>x</sub>-Co-1 and Se-FeO<sub>x</sub>-Co-2 materials.

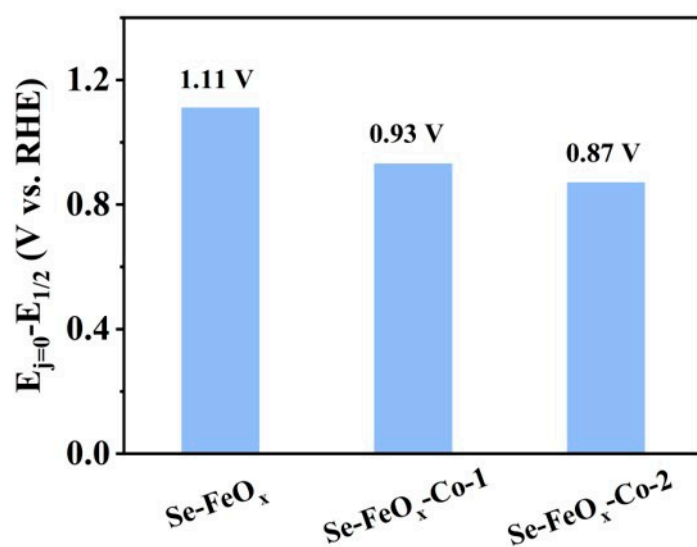

**Figure S4.** The relative bar in the value of  $E_{j=0}-E_{1/2}$ .

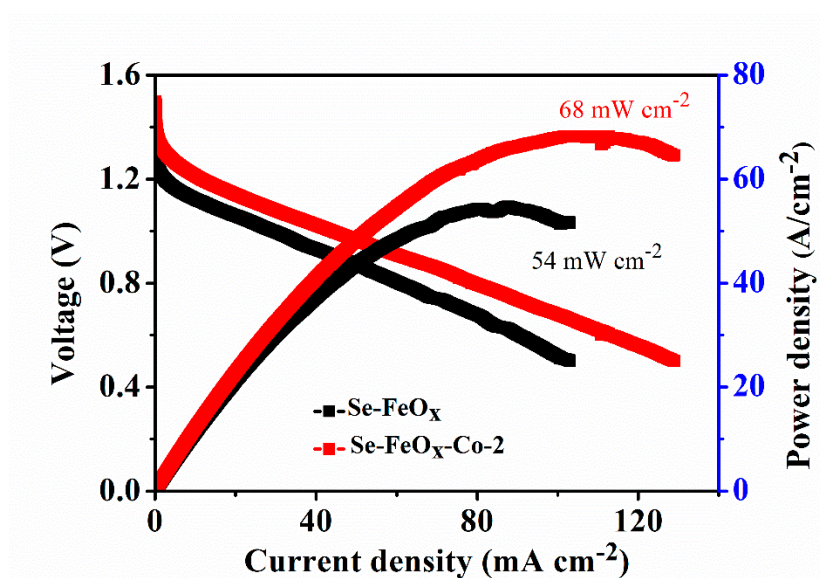

**Figure S5.** The polarization and power density curves of Se-FeO<sub>x</sub> and Se-FeO<sub>x</sub>-Co-2 materials as cathode.

**Table S1.** The ORR and OER performance comparison with reported references

| Catalyst                                     | ORR<br>Electrolytes | Half-wave<br>potential<br>(V vs. RHE) | OER<br>Electrolytes | Potential<br>$E_{j=10}$<br>(V vs. RHE) | Potential<br>Gap<br>(V) | Ref.         |
|----------------------------------------------|---------------------|---------------------------------------|---------------------|----------------------------------------|-------------------------|--------------|
| <b>Se-FeOx-Co-2</b>                          | 0.1 M KOH           | 0.64                                  | 1 M KOH             | 1.51                                   | 0.87                    | This<br>work |
| <b>Ni/NiOH<sub>x</sub></b>                   | 0.1 M KOH           | 0.62                                  | 1 M KOH             | 1.47                                   | 0.86                    | [68]         |
| <b>Ni/NGr</b>                                | 0.1 M KOH           | 0.62                                  | 1 M KOH             | 1.62                                   | 1.01                    | [67]         |
| <b>Co<sub>3</sub>O<sub>4</sub>/CC</b>        | 0.1 M KOH           | 0.73                                  | 1 M KOH             | 1.59                                   | 0.88                    | [66]         |
| <b>TiC<sub>0.25</sub>N<sub>0.75</sub></b>    | 0.1 M KOH           | 0.62                                  | --                  | --                                     | --                      | [65]         |
| <b>CoO/N-doped<br/>graphene</b>              | --                  | --                                    | 1 M KOH             | 1.55                                   | --                      | [62]         |
| <b>Co<sub>3</sub>O<sub>4</sub> nanosheet</b> | --                  | --                                    | 1 M KOH             | 1.56                                   | --                      | [63]         |
| <b>N-doped<br/>graphene/CNT</b>              | 0.1 M KOH           | 0.63                                  | --                  | --                                     | --                      | [64]         |
